# Supplementary material for: Anchoring of Heterochromatin to the Nuclear Lamina Reinforces Dosage Compensation-Mediated Gene Repression
Source: PubMed Central journal article supplement (PMC5045178; doi:10.1371/journal.pgen.1006341), 2016-09-30
Supplement: pgen.1006341.s007.pdf [file pgen.1006341.s007.pdf]

| whole X paint                                           |            |            |              |            |            |            |              |            |            |             |
|---------------------------------------------------------|------------|------------|--------------|------------|------------|------------|--------------|------------|------------|-------------|
|                                                         | N2         | set-25     | met-2 set-25 | cec-4      | lem-2      | dpy-21     | dpy-27(RNAi) | XO herm    | wt male    | set-25 male |
| n                                                       | 10         | 10         | 10           | 10         | 10         | 10         | 10           | 10         | 10         | 10          |
| peripheral %                                            | 0.2460166  | 0.18108734 | 0.17100431   | 0.12483749 | 0.14885454 | 0.23171619 | 0.15055586   | 0.14006767 | 0.10578356 | 0.08473489  |
| st dev                                                  | 0.12317077 | 0.08394753 | 0.09806461   | 0.07869138 | 0.08338365 | 0.17584326 | 0.10072818   | 0.06415232 | 0.07645738 | 0.07217885  |
| intermed %                                              | 0.51555485 | 0.38185777 | 0.37545447   | 0.33605121 | 0.33670623 | 0.42227491 | 0.42842662   | 0.49212446 | 0.36320889 | 0.26202141  |
| st dev                                                  | 0.11855283 | 0.05666637 | 0.08394526   | 0.08337165 | 0.06486988 | 0.12696711 | 0.09175781   | 0.09170447 | 0.08244027 | 0.12066364  |
| central %                                               | 0.23842855 | 0.43705489 | 0.45354122   | 0.5391113  | 0.51443923 | 0.3460089  | 0.42101753   | 0.36780787 | 0.53100755 | 0.6532437   |
| st dev                                                  | 0.09564744 | 0.10651531 | 0.13278119   | 0.11776565 | 0.11001907 | 0.22261633 | 0.1343343    | 0.126949   | 0.13926637 | 0.17946691  |
| t-test of central ring compared to N2 hermaphrodite     |            |            |              |            |            |            |              |            |            |             |
|                                                         |            | 0.00085208 | 0.00070257   | 9.5192E-06 | 2.3491E-05 | 0.18809096 | 0.00320924   | 0.02177761 | 5.6208E-05 | 3.7175E-06  |
| t-test of central ring compared to set-25 hermaphrodite |            |            |              |            |            |            |              |            |            |             |
|                                                         |            |            | 0.76784616   |            |            |            |              |            |            | 0.09960997  |
| t-test compared to wt male                              |            |            |              |            |            |            |              |            |            |             |

| left X probe                                        |            |            |            |            |              |
|-----------------------------------------------------|------------|------------|------------|------------|--------------|
|                                                     | N2         | set-25     | lem-2      | cec-4      | dpy-27(RNAi) |
| n                                                   | 12         | 12         | 12         | 12         | 12           |
| peripheral %                                        | 0.24059006 | 0.19880636 | 0.08421264 | 0.16131613 | 0.16444175   |
| st dev                                              | 0.12888683 | 0.16120025 | 0.08460705 | 0.13741298 | 0.17310133   |
| intermed %                                          | 0.60562542 | 0.50227208 | 0.6161937  | 0.53208363 | 0.54276048   |
| st dev                                              | 0.06694305 | 0.12348118 | 0.15840007 | 0.18913377 | 0.18914569   |
| central %                                           | 0.15378454 | 0.29892157 | 0.29959368 | 0.30660023 | 0.29279777   |
| st dev                                              | 0.13005938 | 0.14996516 | 0.20293387 | 0.25018588 | 0.24752464   |
| t-test of central ring compared to N2 hermaphrodite |            |            |            |            |              |
|                                                     |            | 0.01895785 | 0.04995183 | 0.07821709 | 0.10355896   |

| Middle X probe                                      |            |            |            |            |              |            |            |             |
|-----------------------------------------------------|------------|------------|------------|------------|--------------|------------|------------|-------------|
|                                                     | N2         | set-25     | lem-2      | cec-4      | dpy-27(RNAi) | XO herm    | wt male    | set-25 male |
| n                                                   | 12         | 12         | 12         | 12         | 12           | 10         | 10         | 10          |
| peripheral %                                        | 0.219341   | 0.13426402 | 0.18524328 | 0.23265349 | 0.31545998   | 0.17023531 | 0.12021431 | 0.09025599  |
| st dev                                              | 0.17906491 | 0.10996228 | 0.12817088 | 0.08833383 | 0.2030099    | 0.12669977 | 0.07361085 | 0.08042172  |
| intermed %                                          | 0.61054607 | 0.35300007 | 0.37657471 | 0.39334755 | 0.41918957   | 0.40027687 | 0.28490383 | 0.30690104  |
| st dev                                              | 0.16494192 | 0.08933676 | 0.14280516 | 0.08937391 | 0.09451049   | 0.18146025 | 0.17001368 | 0.16435189  |
| central %                                           | 0.17011293 | 0.51273591 | 0.43818202 | 0.37399896 | 0.26535045   | 0.42948782 | 0.59488186 | 0.60284297  |
| st dev                                              | 0.14102809 | 0.17738852 | 0.24039562 | 0.13893657 | 0.22160637   | 0.25248608 | 0.21750042 | 0.21740858  |
| t-test of central ring compared to N2 hermaphrodite |            |            |            |            |              |            |            |             |
|                                                     |            | 4.3012E-05 | 0.0040592  | 0.00221382 | 0.23182446   | 0.00718188 | 9.0914E-05 | 7.4828E-05  |
| t-test with wt male                                 |            |            |            |            |              |            |            |             |
|                                                     |            |            |            |            |              |            |            | 0.93565866  |

| Right X probe                                       |            |            |            |            |              |
|-----------------------------------------------------|------------|------------|------------|------------|--------------|
|                                                     | N2         | set-25     | lem-2      | cec-4      | dpy-27(RNAi) |
| n                                                   | 12         | 12         | 12         | 12         | 12           |
| peripheral %                                        | 0.25088158 | 0.3116153  | 0.25253889 | 0.27816668 | 0.11216881   |
| st dev                                              | 0.14277669 | 0.20004045 | 0.15345298 | 0.16198887 | 0.10510497   |
| intermed %                                          | 0.54939892 | 0.48653712 | 0.61143382 | 0.55403456 | 0.58685975   |
| st dev                                              | 0.09645279 | 0.14703048 | 0.0966098  | 0.15558981 | 0.20696769   |
| central %                                           | 0.19971952 | 0.20184757 | 0.13602729 | 0.16779875 | 0.3009714    |
| st dev                                              | 0.16839145 | 0.18234042 | 0.12730597 | 0.24469094 | 0.2564932    |
| t-test of central ring compared to N2 hermaphrodite |            |            |            |            |              |
|                                                     |            | 0.97657508 | 0.30811983 | 0.71370518 | 0.26718607   |

**S1 Table. Statistical analysis of X chromosome FISH with the three zone assay.**

n indicates number of nuclei analyzed. Average % of paint signal in each ring and standard deviations are shown. Results of statistical analysis using Student's test on the portion of the signal in the central ring are below each data set.
