# Supplementary material for: Anchoring of Heterochromatin to the Nuclear Lamina Reinforces Dosage Compensation-Mediated Gene Repression
Source: PubMed Central journal article supplement (PMC5045178; doi:10.1371/journal.pgen.1006341), 2016-09-30
Supplement: pgen.1006341.s008.pdf [file pgen.1006341.s008.pdf]

| Whole chr I paint                                                  |            |            |            |            |            |
|--------------------------------------------------------------------|------------|------------|------------|------------|------------|
|                                                                    | N2         | met-2      | set-25     | cec-4      | lem-2      |
| n                                                                  | 10         | 10         | 10         | 10         | 10         |
| peripheral %                                                       | 0.27498174 | 0.28393391 | 0.32433095 | 0.27035885 | 0.33438014 |
| st dev                                                             | 0.15508742 | 0.1178846  | 0.15313704 | 0.12927037 | 0.08154668 |
| intermed %                                                         | 0.32962194 | 0.40729479 | 0.42261037 | 0.38715812 | 0.37789169 |
| st dev                                                             | 0.06548054 | 0.07281563 | 0.07054663 | 0.06638567 | 0.04499781 |
| central %                                                          | 0.39539632 | 0.3087713  | 0.25305867 | 0.34248303 | 0.28772817 |
| st dev                                                             | 0.19366442 | 0.12723365 | 0.16203304 | 0.17888866 | 0.09688504 |
| t-test of central ring compared to N2 hermaphrodite                |            |            |            |            |            |
|                                                                    |            | 0.25490246 | 0.09205845 | 0.53367557 | 0.13946616 |
| t-test of central ring compared to X chromosome paint central ring |            |            |            |            |            |
|                                                                    | 0.03985768 |            |            |            |            |

| Left chr I paint                      |            |            |
|---------------------------------------|------------|------------|
|                                       | N2         | set-25     |
| n                                     | 10         | 10         |
| peripheral %                          | 0.46685393 | 0.42616007 |
| st dev                                | 0.17003909 | 0.15502068 |
| intermed %                            | 0.3625494  | 0.4885656  |
| st dev                                | 0.10119311 | 0.1273334  |
| central %                             | 0.17059667 | 0.08527433 |
| st dev                                | 0.10999698 | 0.08684983 |
| t-test of central ring compared to N2 |            |            |
|                                       |            | 0.07102638 |

| Middle chr I paint                                          |            |            |
|-------------------------------------------------------------|------------|------------|
|                                                             | N2         | set-25     |
| n                                                           | 10         | 10         |
| peripheral %                                                | 0.12857949 | 0.13774714 |
| st dev                                                      | 0.12385027 | 0.0527957  |
| intermed %                                                  | 0.51425098 | 0.46450183 |
| st dev                                                      | 0.14121135 | 0.13704882 |
| central %                                                   | 0.35716953 | 0.39775103 |
| st dev                                                      | 0.19140075 | 0.1152638  |
| t-test of central ring compared to N2                       |            |            |
|                                                             |            | 0.57436305 |
| t-test of central ring compared to X-mid central ring in N2 |            |            |
|                                                             | 0.01802029 |            |

| Right chr I paint                     |            |            |
|---------------------------------------|------------|------------|
|                                       | N2         | set-25     |
| n                                     | 10         | 10         |
| peripheral %                          | 0.48173491 | 0.46238507 |
| st dev                                | 0.14179603 | 0.22371649 |
| intermed %                            | 0.4352292  | 0.40681055 |
| st dev                                | 0.08409888 | 0.12059219 |
| central %                             | 0.08303589 | 0.13080437 |
| st dev                                | 0.0771285  | 0.17828623 |
| t-test of central ring compared to N2 |            |            |
|                                       |            | 0.45154159 |

**S2 Table. Statistical analysis of chromosome I FISH with the three zone assay.**

n indicates number of nuclei analyzed. Average % of paint signal in each ring and standard deviations are shown. Results of statistical analysis using Student's test on the portion of the signal in the central ring are below each data set.
